# Supplementary material for: Genomic Characterization of the Mouse Ribosomal DNA Locus
Source: PubMed Central journal article supplement (PMC3931559; doi:10.1534/g3.113.009290), 2013-12-17
Supplement: supp_g3.113.009290_009290SI.pdf [file supp_g3.113.009290_009290SI.pdf]

## Genomic characterization of the mouse ribosomal DNA locus

Gabriel E. Zentner<sup>\*1</sup>, Stephanie A. Balow<sup>\*</sup>, and Peter C. Scacheri<sup>\*§</sup>

<sup>\*</sup>Department of Genetics and Genome Sciences, Case Western Reserve University, 2109 Adelbert Rd., Cleveland, OH 44106, USA

<sup>§</sup>Comprehensive Cancer Center, Case Western Reserve University, 11000 Euclid Ave., Cleveland, OH 44106, USA

<sup>1</sup>Current address: Basic Sciences Division, Fred Hutchinson Cancer Research Center, 1100 Fairview Ave. N., Seattle, WA 98109, USA

Correspondence to Peter C. Scacheri

BRB 627

Case Western Reserve University

2109 Adelbert Rd.

Cleveland, OH 44106, USA

Email: pxs183@case.edu

Tel: 216-368-3458

Fax: 216-368-3432

**DOI: 10.1534/g3.113.009290**

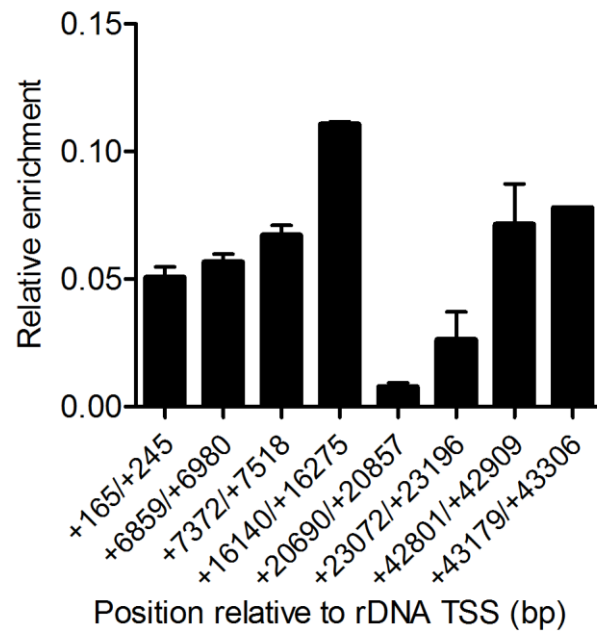

**Figure S1** ChIP-PCR analysis of OCT4 binding to rDNA in mESCs.

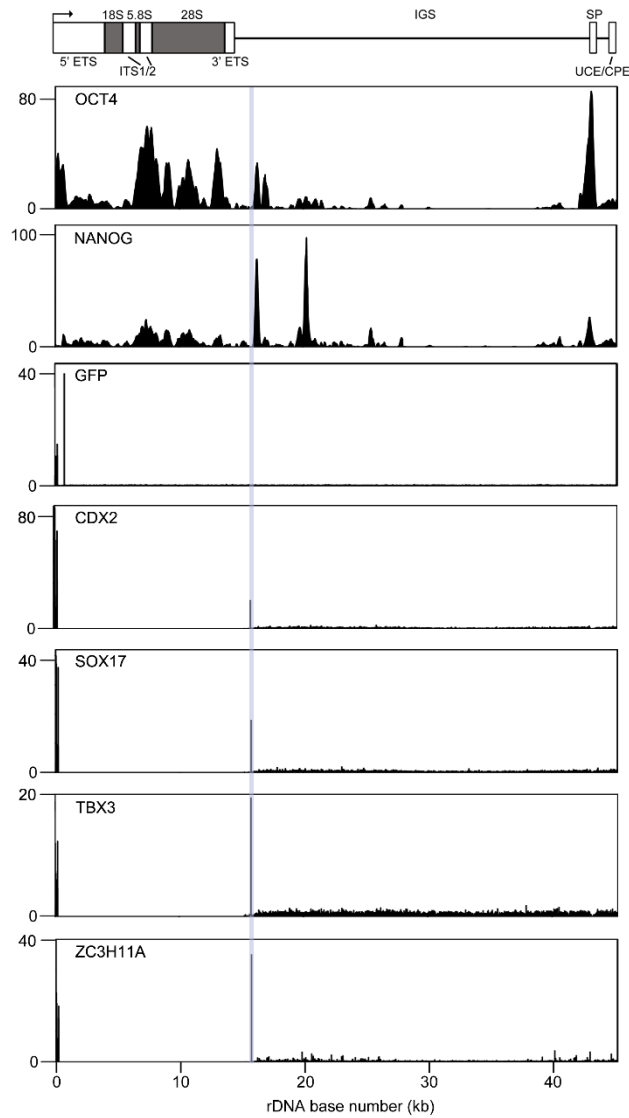

**Figure S2** Negative controls for chromatin-binding protein association with rDNA in mESCs. Nuclear-targeted GFP as well as four transcription factors fail to bind rDNA in mESCs, indicating that the association of pluripotency factors with rDNA is specific. OCT4 and NANOG rDNA ChIP-seq profiles are shown for comparison.

**Table S1 Mappability values of mouse rDNA as determined by BEADS.**

Available for download as an Excel file at <http://www.g3journal.org/lookup/suppl/doi:10.1534/g3.113.009290/-/DC1>

**Table S2 Primers used for ChIP-PCR assays**

| Amplicon relative to rDNA TSS (bp) | Forward primer (5' - 3') | Reverse primer (5' - 3') |
|------------------------------------|--------------------------|--------------------------|
| +165/245                           | CTTGCGTGTGCTTGCTGT       | GAAATCGGGAAAAACGTCTG     |
| +6859/+6986                        | ACACCCGAAATACCGATACG     | AGTGCGTTCGAAGTGTCGAT     |
| +7372/+7518                        | CATCTGCTCTGGTCGAGGTT     | GCAAGACCCAAACACACACA     |
| +16140/+16275                      | CCCTTTTACACCTCCCCCTA     | TTTCCAAAGGGCTACATTGC     |
| +20690/+20857                      | GGAATCCGATGCACACTTTT     | TGTGTGTGTGTGTGTGTGTA     |
| +23072/+23196                      | AATACGCCGTGTGTGTGTGT     | CAATGTGCCTTCATGATCAAA    |
| +42801/+42909                      | AACTGTGCCTGTTCCCTCAC     | GGCACCCAAAAACGAAAGTA     |
| +43179/+43306                      | GACACAGGAGAGGGAAGTGC     | CTCCCTGTACGACCTCCTTG     |

**Table S3 Primers used for qRT-PCR assays**

| Target       | Forward primer (5' - 3') | Reverse primer (5' - 3') |
|--------------|--------------------------|--------------------------|
| pre-rRNA     | TGTCTGCCCGTATCAGTAACTGTC | CCCTGGCCCGAAGAGAACT      |
| <i>GAPDH</i> | AAGGTCATCCCAGAGCTGAA     | AGACAACCTGGTCCTCAGTGTAG  |
