# Supplementary material for: Genomic Characterization of the Mouse Ribosomal DNA Locus
Source: PubMed Central journal article supplement (PMC3931559; doi:10.1534/g3.113.009290), 2013-12-17
Supplement: supp_g3.113.009290_FigureS1.pdf [file supp_g3.113.009290_FigureS1.pdf]

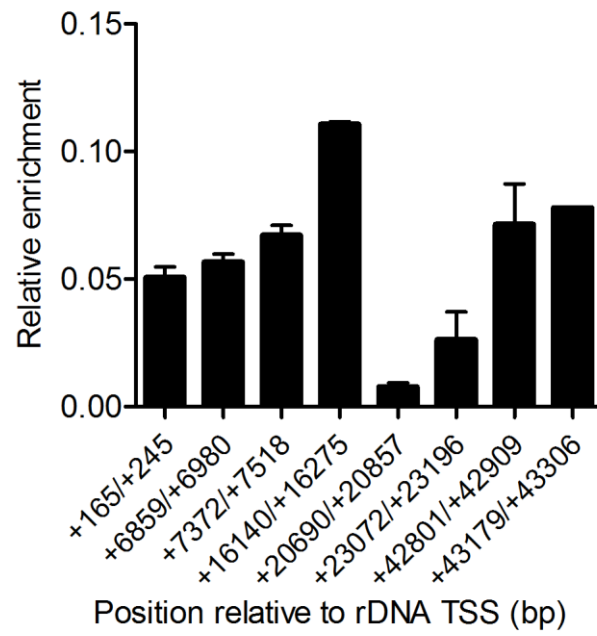

**Figure S1** ChIP-PCR analysis of OCT4 binding to rDNA in mESCs.
