# Supplementary material for: Genomic Characterization of the Mouse Ribosomal DNA Locus
Source: PubMed Central journal article supplement (PMC3931559; doi:10.1534/g3.113.009290), 2013-12-17
Supplement: supp_g3.113.009290_FigureS2.pdf [file supp_g3.113.009290_FigureS2.pdf]

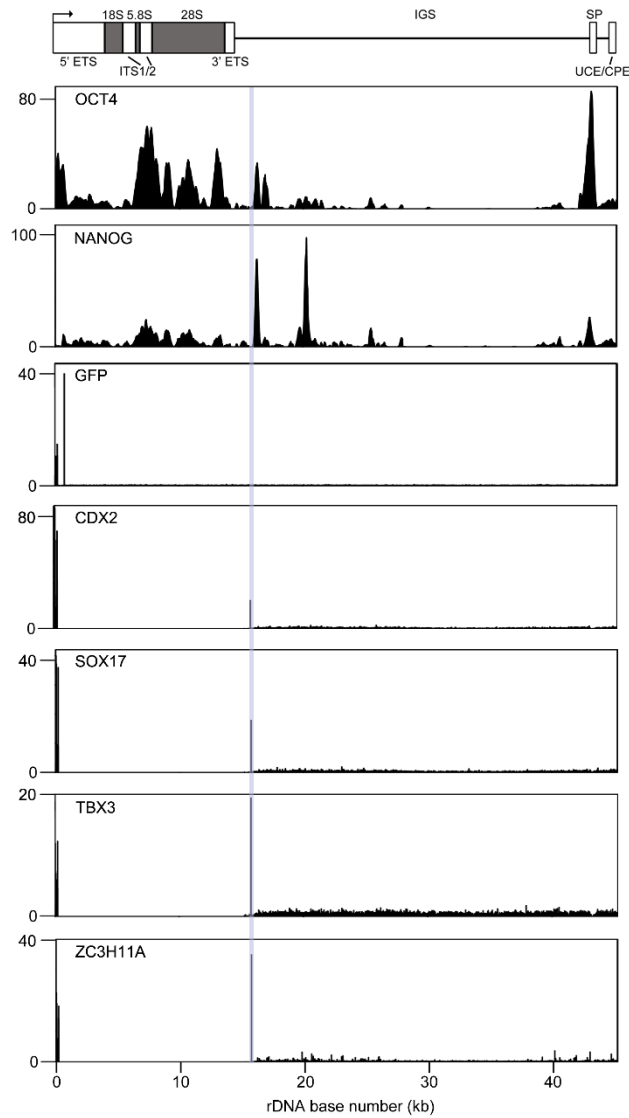

**Figure S2** Negative controls for chromatin-binding protein association with rDNA in mESCs. Nuclear-targeted GFP as well as four transcription factors fail to bind rDNA in mESCs, indicating that the association of pluripotency factors with rDNA is specific. OCT4 and NANOG rDNA ChIP-seq profiles are shown for comparison.
