# Supplementary material for: Genomic Characterization of the Mouse Ribosomal DNA Locus
Source: PubMed Central journal article supplement (PMC3931559; doi:10.1534/g3.113.009290), 2013-12-17
Supplement: supp_g3.113.009290_TableS2.pdf [file supp_g3.113.009290_TableS2.pdf]

**Table S2 Primers used for ChIP-PCR assays**

| Amplicon relative to rDNA TSS (bp) | Forward primer (5' - 3') | Reverse primer (5' - 3') |
|------------------------------------|--------------------------|--------------------------|
| +165/245                           | CTTGCGTGTGCTTGCTGT       | GAAATCGGGAAAAACGTCTG     |
| +6859/+6986                        | ACACCCGAAATACCGATACG     | AGTGCGTTCGAAGTGTCGAT     |
| +7372/+7518                        | CATCTGCTCTGGTCGAGGTT     | GCAAGACCCAAACACACACA     |
| +16140/+16275                      | CCCTTTTACACCTCCCCCTA     | TTTCCAAAGGGCTACATTGC     |
| +20690/+20857                      | GGAATCCGATGCACACTTTT     | TGTGTGTGTGTGTGTGTGTA     |
| +23072/+23196                      | AATACGCCGTGTGTGTGTGT     | CAATGTGCCTTCATGATCAAA    |
| +42801/+42909                      | AACTGTGCCTGTTCCCTCAC     | GGCACCCAAAAACGAAAGTA     |
| +43179/+43306                      | GACACAGGAGAGGGAAGTGC     | CTCCCTGTACGACCTCCTTG     |
