# Supplementary material for: Genomic Characterization of the Mouse Ribosomal DNA Locus
Source: PubMed Central journal article supplement (PMC3931559; doi:10.1534/g3.113.009290), 2013-12-17
Supplement: supp_g3.113.009290_TableS3.pdf [file supp_g3.113.009290_TableS3.pdf]

**Table S3 Primers used for qRT-PCR assays**

| Target       | Forward primer (5' - 3') | Reverse primer (5' - 3') |
|--------------|--------------------------|--------------------------|
| pre-rRNA     | TGTCTGCCCGTATCAGTAACTGTC | CCCTGGCCCGAAGAGAACT      |
| <i>GAPDH</i> | AAGGTCATCCCAGAGCTGAA     | AGACAACCTGGTCCTCAGTGTAG  |
